# Supplementary material for: Validation of the Internal Coherence Scale (ICS) in Healthy Geriatric Individuals and Patients Suffering from Diabetes Mellitus Type 2 and Cancer
Source: Geriatrics (Basel). 2024 May 14;9(3):63. doi: 10.3390/geriatrics9030063 (PMC11130969; doi:10.3390/geriatrics9030063)
Supplement: Supplementary file 1 [file geriatrics-09-00063-s001.zip]

Archive with 4 entries (4 files):
- Table S1_demographics_130524.pdf
- Table S2_PCA_130524.pdf
- Table S3_correlations_13524.pdf
- Table S4_ART_130524.pdf
